# Supplementary material for: Effect of Vitamin D3 Supplementation on Severe COVID-19: A Meta-Analysis of Randomized Clinical Trials
Source: MDPI journal article supplement (doi:10.3390/nu16101402), 2024-05-07
Supplement: s1 [file s1]

|       |    | Risk of bias domains |    |    |    |    |    |    |         |
|-------|----|----------------------|----|----|----|----|----|----|---------|
|       |    | D1                   | D2 | D3 | D4 | D5 | D6 | D7 | Overall |
| Study | 1  | +                    | -  | X  | +  | +  | +  | +  | +       |
|       | 2  | +                    | -  | X  | X  | +  | +  | +  | X       |
|       | 3  | +                    | +  | +  | X  | +  | +  | +  | +       |
|       | 4  | +                    | -  | X  | X  | +  | +  | +  | X       |
|       | 5  | +                    | -  | +  | X  | +  | +  | +  | +       |
|       | 6  | +                    | +  | +  | X  | +  | +  | +  | +       |
|       | 7  | +                    | +  | X  | X  | +  | +  | +  | +       |
|       | 8  | +                    | -  | -  | X  | +  | +  | +  | X       |
|       | 9  | +                    | -  | X  | X  | +  | +  | +  | X       |
|       | 10 | +                    | -  | +  | X  | +  | +  | +  | +       |
|       | 11 | +                    | +  | +  | +  | +  | +  | +  | +       |
|       | 12 | +                    | -  | +  | X  | +  | +  | +  | +       |
|       | 13 | +                    | -  | X  | +  | +  | +  | +  | +       |

D1: Random sequence generation  
D2: Allocation concealment  
D3: Blinding of participants and personnel  
D4: Blinding of outcome assessment  
D5: Incomplete outcome data  
D6: Selective reporting  
D7: Other bias

**Judgement**  
 Low  
 Unclear  
 High

**Figure S1.** Risk of bias of included studies.

(1) Cannata-Andía et al., 2022; (2) Cervero et al., 2022; (3) Murai et al., 2021; (4) Karonova et al., 2022; (5) Jaun e al., 2023; (6) Bychinin et al., 2022; (7) Zurita-Cruz et al., 2022; (8) Sarhan et al., 2022; (9) Annweiler et al., 2022; (10) Mariani et al., 2022; (11) De Niet et al., 2022; (12) Maghbooli et al., 2021; (13) Domazet Bugarin et al.,2023.

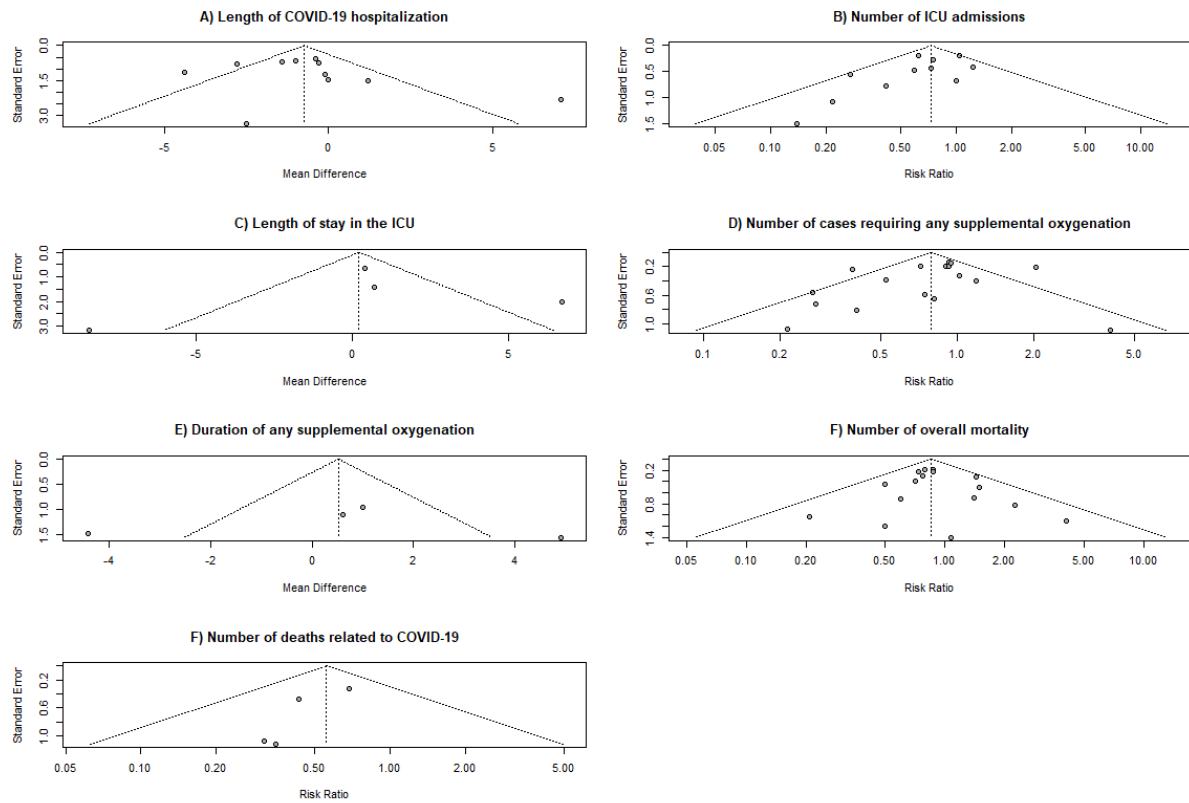

**Figure S2.** Funnel plots for the associations of between vitamin D3 supplementation and COVID-19.
